# Supplementary material
Source: ML conference proceedings conference paper supplement (https://openreview.net/forum?id=P4W74BXoyBy)
Supplement: supplementary_material [file attachment]

---

# Supplementary Material of Rot-Pro: Modeling Transitivity by Projection in Knowledge Graph Embedding

---

Tengwei Song, Jie Luo\*, Lei Huang  
State Key Laboratory of Software Development Environment  
Beihang University, Beijing, 100191  
{songtengwei,luojie,huangleiai}@buaa.edu.cn

## A Proof of a property of transitive relation

In section 3.2 of the submitted paper, we use the conclusion that “the transitive relation can be represented as the union of transitive closures of all transitive chains.” Here, we prove it in the following lemma.

**Lemma 1.** *A transitive relation can be represented as the union of transitive closures of all transitive chains.*

*Proof.* For any given transitive relation  $r$ , it can be represented as a directed graph  $G_r$  which satisfies that for any vertex  $e$  and  $e'$ , if there is a path from  $e$  to  $e'$ , then there is an edge connecting  $e$  to  $e'$  directly. We can see that if there is a path  $e, e_1, \dots, e_m, e'$  from  $e$  to  $e'$  whose length is larger than 1 (i.e.  $m \geq 1$ ), then the edge connecting  $e$  and  $e'$  directly can be derived through transitivity, i.e. the transitive chain  $(e, r, e_1), \dots, (e_m, r, e')$  implies that  $(e, r, e')$ . By removing any edge  $(e, r, e')$  that  $e$  and  $e'$  is connected by a path longer than 1, we can obtain a new graph  $G'_r$ . For any instance  $(e, r, e')$ , if it is an edge in  $G'_r$ , then  $(e, r, e')$  is a transitive chain itself and hence it is in the transitive closure of itself; otherwise,  $(e, r, e')$  is an edge removed from  $G_r$  and hence there is a path from  $e$  to  $e'$  in  $G_r$  whose length is larger than 1, then  $(e, r, e')$  can be derived through transitivity based on the path, i.e.  $(e, r, e')$  is in the transitive closure of the path (transitive chain). Hence any instance of a transitive relation is in a transitive closure of a transitive chain. Thus, a transitive relation can be represented as the union of transitive closures of all transitive chains.  $\square$

## B Statistics and split of datasets.

The datasets we used for experiments are open-sourced, which can be obtained in the source code<sup>2</sup> of RotatE [1]. Table 1 shows the statistic of these datasets, where the number of training triples in the S1, S2, and S3 datasets of Counties are separated by '/'.

## C Computational resources

Our model is implemented in Python 3.6 using Pytorch 1.1.0. Experiments are performed on a workstation with Intel Xeon Gold 5118 2.30GHz CPU and NVIDIA Tesla V100 16GB GPU.

---

\*Corresponding author.

<sup>2</sup><https://github.com/DeepGraphLearning/KnowledgeGraphEmbedding/tree/master/data>

Table 1: Statistics of datasets

|           | entities | relations | Triples           |        |        |
|-----------|----------|-----------|-------------------|--------|--------|
|           |          |           | train             | valid  | test   |
| FB15k-237 | 14,541   | 237       | 272,115           | 17,535 | 20,466 |
| WN18RR    | 40,943   | 11        | 86,835            | 3,034  | 3,134  |
| YAGO3-10  | 123,182  | 37        | 1,079,040         | 5,000  | 5,000  |
| Countries | 271      | 2         | 985/ 1,063/ 1,111 | 24     | 24     |

## D Hyper-parameter settings

We list the best hyper-parameter setting of Rot-Pro on the above datasets in Table 2. The setting of dimension  $d$  and batch size  $b$  is the same as RotatE [1].

Table 2: Hyper-parameter settings

|           | dimension $d$ | batch size $b$ | fixed margin $\gamma$ | $\gamma_m$ | $\beta$ | $\alpha$ |
|-----------|---------------|----------------|-----------------------|------------|---------|----------|
| FB15k-237 | 1000          | 1024           | 9.0                   | 0.000001   | 1.5     | 0.001    |
| WN18RR    | 500           | 512            | 4.0                   | 0.000001   | 1.3     | 0.0003   |
| YAGO3-10  | 500           | 1024           | 16.0                  | 0.000001   | 1.5     | 0.0005   |
| Countries | 500           | 512            | 0.1                   | 0.000001   | 1.5     | 0.0005   |

## E Transitivity performance comparison with BoxE

The fully expressive of BoxE refers to that it is able to express inference patterns, which includes symmetry, anti-symmetry, inversion, composition, hierarchy, intersection, and mutual exclusion. However, it does not model and infer the transitivity pattern. Therefore, we further conducted experiments on the three sub-test sets S1, S2, S3 we sampled from YAGO3-10 as described in the paper to verify this. The experimental results are listed as below.

Table 3: Link prediction result of BoxE and Rot-Pro on S1, S2, S3 test sets.

|        | S1   |         | S2   |         | S3   |         |
|--------|------|---------|------|---------|------|---------|
|        | BoxE | Rot-Pro | BoxE | Rot-Pro | BoxE | Rot-Pro |
| MR     | .343 | .337    | .290 | .328    | .381 | .447    |
| Hit@1  | .255 | .247    | .262 | .235    | .349 | .337    |
| Hit@3  | .385 | .376    | .291 | .366    | .385 | .517    |
| Hit@10 | .504 | .512    | .342 | .522    | .439 | .626    |

## References

- [1] Zhiqing Sun, Zhi-Hong Deng, Jian-Yun Nie, and Jian Tang. RotatE: Knowledge graph embedding by relational rotation in complex space. In *International Conference on Learning Representations*, 2019.

## Checklist

1. For all authors...
  - (a) Do the main claims made in the abstract and introduction accurately reflect the paper’s contributions and scope? [Yes]
  - (b) Did you describe the limitations of your work? [Yes]
  - (c) Did you discuss any potential negative societal impacts of your work? [N/A]

- (d) Have you read the ethics review guidelines and ensured that your paper conforms to them? [Yes]
- 2. If you are including theoretical results...
  - (a) Did you state the full set of assumptions of all theoretical results? [Yes]
  - (b) Did you include complete proofs of all theoretical results? [Yes]
- 3. If you ran experiments...
  - (a) Did you include the code, data, and instructions needed to reproduce the main experimental results (either in the supplemental material or as a URL)? [Yes] We will provide in the supplemental material.
  - (b) Did you specify all the training details (e.g., data splits, hyperparameters, how they were chosen)? [Yes]
  - (c) Did you report error bars (e.g., with respect to the random seed after running experiments multiple times)? [No]
  - (d) Did you include the total amount of compute and the type of resources used (e.g., type of GPUs, internal cluster, or cloud provider)? [Yes] We will provide in the supplemental material.
- 4. If you are using existing assets (e.g., code, data, models) or curating/releasing new assets...
  - (a) If your work uses existing assets, did you cite the creators? [Yes]
  - (b) Did you mention the license of the assets? [Yes] We will provide in the supplemental material.
  - (c) Did you include any new assets either in the supplemental material or as a URL? [Yes] We will provide code in the supplemental material.
  - (d) Did you discuss whether and how consent was obtained from people whose data you're using/curating? [N/A]
  - (e) Did you discuss whether the data you are using/curating contains personally identifiable information or offensive content? [N/A]
- 5. If you used crowdsourcing or conducted research with human subjects...
  - (a) Did you include the full text of instructions given to participants and screenshots, if applicable? [N/A]
  - (b) Did you describe any potential participant risks, with links to Institutional Review Board (IRB) approvals, if applicable? [N/A]
  - (c) Did you include the estimated hourly wage paid to participants and the total amount spent on participant compensation? [N/A]
